# Supplementary material for: Substitution position tuning of the different aggregation-induced emission properties of four (1-naphthyl)vinyl(9-anthryl)vinylbenzene isomers: from ACQ to AIEE and AIE
Source: Royal Society of Chemistry journal article supplement (doi:10.1039/c3ra40612a), 2013-01-01
Supplement: c3ra40612a.pdf [file c3ra40612a.pdf]

## Supplementary Information

### Substitution Position Tuning the Different Aggregation-induced Emission Properties of Four (1-Naphthyl)vinyl(9-anthryl)vinylbenzene Isomers: from ACQ, AIEE to AIE

Ye-Xin Li,<sup>\*a,b</sup> Mao-Ping Pang,<sup>a</sup> Zhen-Wei Zhang,<sup>a</sup> Guo-Bao Li,<sup>a</sup> and Guo-Xin Sun<sup>\*a</sup>

<sup>a</sup> School of Chemistry and Chemical Engineering, University of Jinan, 250022, Jinan, China

<sup>b</sup> State Key Laboratory of Crystal Materials, Shandong University, 250100, Jinan, China

#### Experimental

##### Materials and Instrumentations

4-[(9-Anthryl)vinyl]benzyltriphenylphosphonium bromide were prepared according to the published procedures.<sup>1</sup> <sup>1</sup>H NMR and <sup>13</sup>C NMR spectra were recorded on a Bruker Avance 300 or 400 spectrometer. Absorption measurements were carried out on a TU-1800 spectrophotometer. Photoluminescence (PL) measurements were recorded using a Hitachi F-4500 fluorescence spectrophotometer. Time-resolved emission decay behavior was recorded on an Edinburgh Instruments FLS920. The absolute photoluminescence quantum efficiency ( $\Phi_F$ ) values of the solid film and CH<sub>2</sub>Cl<sub>2</sub> solution (10<sup>-5</sup> M) were determined on an Edinburgh Instruments FLS920 using an integrating sphere. Elemental analyses were performed using a Perkin Elmer 2400II elemental analyzer. High-resolution mass spectral analyses were carried out on a Bruker maXis UHR-TOF mass spectrometer. Single-crystal X-ray diffraction measurements were conducted on an Oxford Diffraction Gemini E diffractometer. The structure was solved by direct methods and refined by a full-matrix least-squares technique on  $F^2$  using SHELXL-97 programs.<sup>2,3</sup> CCDC-860990 (1,4-*cis,trans*-**NAB**) and CCDC-860992 (1,4-*trans,trans*-**NAB**) contain the supplementary crystallographic

data for this paper. These data can be obtained free of charge from the Cambridge Crystallographic Data Centre via [www.ccdc.cam.ac.uk/data\\_request/cif](http://www.ccdc.cam.ac.uk/data_request/cif).

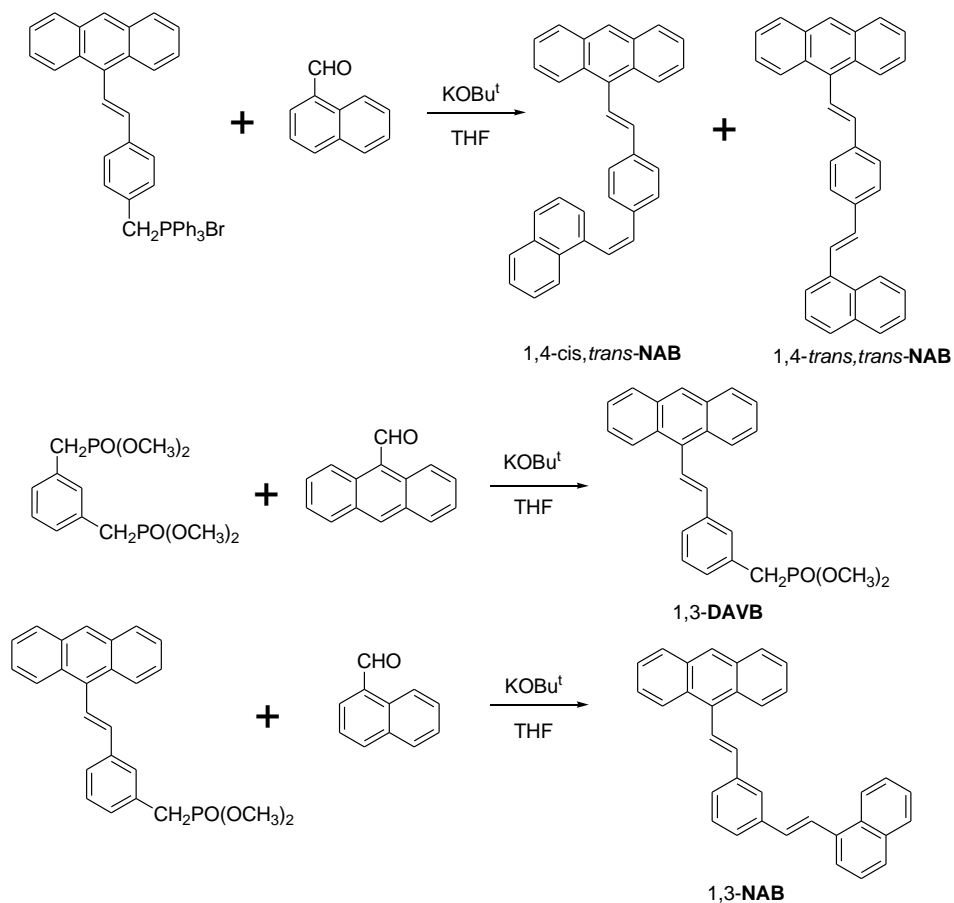

**Scheme S1** Synthetic routes to 1,4-cis,trans-NAB, 1,4-trans,trans-NAB and 1,3-NAB.

## Synthesis

*1-(1-Naphthyl)vinyl-4-(9-anthryl)vinylbenzene (1,4-NAB)*. At room temperature, *t*-BuOK (0.07 g, 0.62 mmol) was added in batch into a mixture of 4-[(9-anthryl)vinyl]benzyltriphenylphosphonium bromide (0.19 g, 0.29 mmol) and 1-naphthylcarboxaldehyde (0.10 g, 0.64 mmol) in CH<sub>2</sub>Cl<sub>2</sub> (20 mL) under nitrogen. After stirring overnight at room temperature, the mixture was poured into H<sub>2</sub>O (40 mL) and extracted by CH<sub>2</sub>Cl<sub>2</sub>. The organic phase was combined and dried over MgSO<sub>4</sub>. After evaporation of the solvent, the crude product was chromatographed on

silica gel (petroleum ether) to afford two yellow solids, which were proved to be a pair of isomers. The first compound was 1,4-*cis,trans*-**NAB** (0.04 g, yield 30.8%), and the second one was 1,4-*trans,trans*-**NAB** (0.06 g, yield 46.2%).

1,4-*Cis,trans*-**NAB**:  $R_f = 0.35$  (petroleum ether/ $\text{CH}_2\text{Cl}_2 = 5:1$ ).  $^1\text{H}$  NMR ( $\text{CDCl}_3$ , 300 MHz)  $\delta$ : 6.83 (d,  $J = 16.5$  Hz, 1H), 6.89 (d,  $J = 12.3$  Hz, 1H), 7.11 (d,  $J = 12.3$  Hz, 1H), 7.17 (d,  $J = 8.4$  Hz, 2H), 7.39-7.48 (m, 8H), 7.51-7.55 (m, 2H), 7.80-7.85 (m, 2H), 7.89-7.92 (m, 1H), 7.98-8.01 (m, 2H), 8.11-8.15 (m, 1H), 8.27-8.30 (m, 2H), 8.38 (s, 1H). Elemental analysis calcd (%) for  $\text{C}_{34}\text{H}_{24}$ : C, 94.41; H, 5.59; found: C, 94.12; H, 5.16.

1,4-*Trans,trans*-**NAB**:  $R_f = 0.26$  (petroleum ether/ $\text{CH}_2\text{Cl}_2 = 5:1$ ).  $^1\text{H}$  NMR ( $\text{CDCl}_3$ , 300 MHz)  $\delta$ : 7.00 (d,  $J = 16.5$  Hz, 1H), 7.23 (d,  $J = 16.5$  Hz, 1H), 7.48-7.61 (m, 7H), 7.68-7.75 (m, 4H), 7.80-7.85 (m, 2H), 7.89-7.91 (m, 1H), 7.95 (d,  $J = 3.0$  Hz, 1H), 8.00-8.05 (m, 3H), 8.28 (d,  $J = 8.1$  Hz, 1H), 8.38-8.43 (m, 3H).  $^{13}\text{C}$  NMR ( $\text{CDCl}_3$ , 75.47 MHz)  $\delta$ : 123.13, 123.24, 124.43, 124.70, 125.02, 125.21, 125.37, 125.51, 125.65, 126.02, 126.50, 126.64, 127.64, 128.17, 128.22, 129.29, 130.79, 130.94, 131.06, 132.24, 133.31, 134.45, 136.34, 136.44, 136.94. Elemental analysis calcd (%) for  $\text{C}_{34}\text{H}_{24}$ : C, 94.41; H, 5.59; found: C, 93.80; H, 6.08.

1-Dimethoxyphosphorylmethyl-3-(9-anthryl)vinylbenzene. At room temperature, *t*-BuOK (1.18 g, 10.6 mmol) was added in batch into a mixture of 1,3-bis(dimethoxyphosphorylmethyl)benzene (3.10 g, 9.63 mmol) and 9-anthrylcarboxaldehyde (1.65 g, 8.01 mmol) in THF (30 mL) under nitrogen. After stirring overnight, the mixture was poured into  $\text{H}_2\text{O}$  (40 mL) and extracted by  $\text{CH}_2\text{Cl}_2$ . The organic phase was combined and dried over  $\text{MgSO}_4$ . After evaporation of the solvent, the crude product was chromatographed on silica gel (ethyl acetate) to afford a yellow solid (1.41 g, yield 43.8%).  $^1\text{H}$  NMR ( $\text{CDCl}_3$ , 400 MHz)  $\delta$ : 3.26 (d,  $J = 21.6$  Hz, 2H), 3.74 (d,  $J = 11.2$  Hz, 6H), 6.94 (d,  $J = 16.4$  Hz, 1H), 7.31 (d,  $J = 7.6$  Hz, 1H), 7.42 (t,  $J = 7.6$  Hz, 1H), 7.44-7.50 (m, 4H), 7.58-7.61 (m, 2H), 7.94 (d,  $J = 16.4$  Hz, 1H), 8.01-8.03 (m, 2H), 8.34-8.36 (m, 2H), 8.42 (s, 1H).  $^{13}\text{C}$  NMR ( $\text{CDCl}_3$ , 100.6 MHz)  $\delta$ : 33.29 (d,  $J = 138.8$  Hz), 53.12 (d,  $J = 7.0$  Hz), 125.32 (d,  $J = 3.0$  Hz), 125.47, 126.66, 126.13, 126.69, 128.20 (d,  $J = 7.0$  Hz), 128.85, 129.26 (d,  $J = 3.0$  Hz), 129.45

(d,  $J = 6.0$  Hz), 129.86, 131.65, 132.04 (d,  $J = 9.0$  Hz), 132.72, 137.08, 137.90 (d,  $J = 3.0$  Hz). MS:  $m/z$  calcd for  $C_{25}H_{24}O_3P$ : 403.1  $[M+H]^+$ ; found: 403.1

*1-Dimethoxyphosphorylmethyl-2-(9-anthryl)vinylbenzene*. This compound was prepared from t-BuOK (0.54 g, 4.8 mmol), 9-anthrylcarboxaldehyde (0.75 g, 3.6 mmol) and 1,2-bis(dimethoxyphosphorylmethyl)benzene (1.4 g, 4.3 mmol) using the same procedure described for 3-dimethoxyphosphorylmethyl-2-(9-anthracenyl)vinylbenzene. The crude product was chromatographed on silica gel (ethyl acetate) to afford a yellow solid (0.46 g, yield 31.2%).  $^1H$  NMR ( $CDCl_3$ , 400 MHz)  $\delta$ : 3.30 (d,  $J = 22.4$  Hz, 2H), 3.72 (d,  $J = 10.8$  Hz, 6H), 7.28 (d,  $J = 16.0$  Hz, 1H), 7.34-7.37 (m, 1H), 7.40-7.44 (m, 2H), 7.46-7.54 (m, 4H), 7.83 (d,  $J = 16.0$  Hz, 1H), 7.95 (d,  $J = 7.6$  Hz, 1H), 8.02-8.04 (m, 2H), 8.39-8.43 (m, 3H).  $^{13}C$  NMR ( $CDCl_3$ , 100.6 MHz)  $\delta$ : 30.29 (d,  $J = 137.8$  Hz), 53.00 (d,  $J = 7.0$  Hz), 125.34, 125.69, 126.05, 126.70 (d,  $J = 3.0$  Hz), 126.78, 127.76, 127.84 (d,  $J = 3.0$  Hz), 128.31 (d,  $J = 4.0$  Hz), 128.87, 129.36 (d,  $J = 9.0$  Hz), 129.86, 131.49 (d,  $J = 4.0$  Hz), 131.63, 132.80, 135.07 (d,  $J = 42.0$  Hz), 137.24 (d,  $J = 6.0$  Hz). MS:  $m/z$  calcd for  $C_{25}H_{24}O_3P$ : 403.1  $[M+H]^+$ ; found: 403.1

*1-(1-Naphthyl)vinyl-3-(9-anthryl)vinylbenzene (1,3-NAB)*. This compound was prepared from t-BuOK (0.23 g, 2.0 mmol), 1-naphthylcarboxaldehyde (0.37 g, 2.4 mmol) and 1-dimethoxyphosphorylmethyl-3-(9-anthryl)vinylbenzene (0.40 g, 1.0 mmol) in THF (20 mL) using the similar procedure described for 1,4-NAB. The crude product was chromatographed on silica gel (petroleum ether) to afford a yellow solid (0.16 g, yield 37.0%).  $^1H$ -NMR (400 MHz,  $[D_6]$ acetone)  $\delta$ : 7.07 (d,  $J = 16.4$  Hz, 1H), 7.41 (d,  $J = 16.0$  Hz, 1H), 7.52-7.58 (m, 8H), 7.76-7.79 (m, 2H), 7.88-7.96 (m, 3H), 8.11-8.13 (m, 2H), 8.21-8.28 (m, 3H), 8.42-8.47 (m, 3H), 8.56 (s, 1H).  $^{13}C$ -NMR (100.6 MHz,  $[D_6]$ acetone)  $\delta$ : 124.27, 124.72, 125.93, 125.97, 126.19, 126.55, 126.67, 126.69, 126.77, 126.82, 127.03, 127.36, 127.53, 128.95, 129.44, 129.60, 130.10, 130.58, 132.37, 132.59, 133.64, 134.87, 135.79, 138.19, 138.74, 139.20. MS:  $m/z$  calcd for  $C_{34}H_{25}$ : 432.2  $[M+H]^+$ ; found: 432.2. Elemental analysis calcd (%) for  $C_{34}H_{24}$ : C, 94.41; H, 5.59; found: C, 94.77; H, 5.50.

*1-(1-Naphthyl)vinyl-2-(9-anthryl)vinylbenzene (1,2-NAB)*. This compound was

prepared from t-BuOK (0.11 g, 0.98 mmol), 1-naphthylcarboxaldehyde (0.16 g, 1.0 mmol) and 1-dimethoxyphosphorylmethyl-2-(9-anthryl)vinylbenzene (0.20 g, 0.50 mmol) in THF (20 mL) using the same procedure described for 1,3-NAB. The crude product was chromatographed on silica gel (petroleum ether/CH<sub>2</sub>Cl<sub>2</sub> = 10:1) to afford a yellow solid (0.10 g, yield 46.3%). <sup>1</sup>H-NMR (400 MHz, [D<sub>6</sub>]acetone) δ: 7.42-7.46 (m, 2H), 7.48-7.54 (m, 8H), 7.74 (d, *J* = 16.0 Hz, 1H), 7.81-7.90 (m, 3H), 7.95-8.02 (m, 3H), 8.07-8.11 (m, 3H), 8.31 (d, *J* = 8.4 Hz, 1H), 8.48-8.50 (m, 2H), 8.55 (s, 1H). <sup>13</sup>C-NMR(100.6 MHz, [D<sub>6</sub>]acetone) δ: 124.42, 124.60, 126.21, 126.60, 126.64, 126.72, 126.79, 127.05, 127.45, 127.94, 128.05, 128.45, 129.00, 129.03, 129.16, 129.29, 129.41, 129.62, 130.26, 130.63, 132.28, 132.63, 133.78, 134.81, 135.76, 136.75, 137.23, 137.28. MS: *m/z* calcd for C<sub>34</sub>H<sub>25</sub>: 432.2 [M+H]<sup>+</sup>; found: 432.2. Elemental analysis calcd (%) for C<sub>34</sub>H<sub>24</sub>: C, 94.41; H, 5.59; found: C, 94.52; H, 5.90.

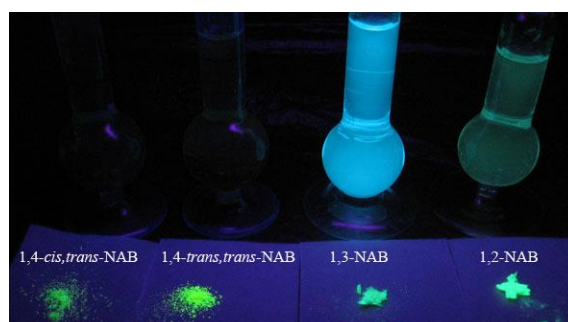

**Fig. S1** Fluorescence image of the THF solutions (upper) and solids (lower) of compounds 1,4-*cis,trans*-NAB, 1,4-*trans,trans*-NAB, 1,3-NAB and 1,2-NAB under illumination with a 365.0 nm UV lamp.

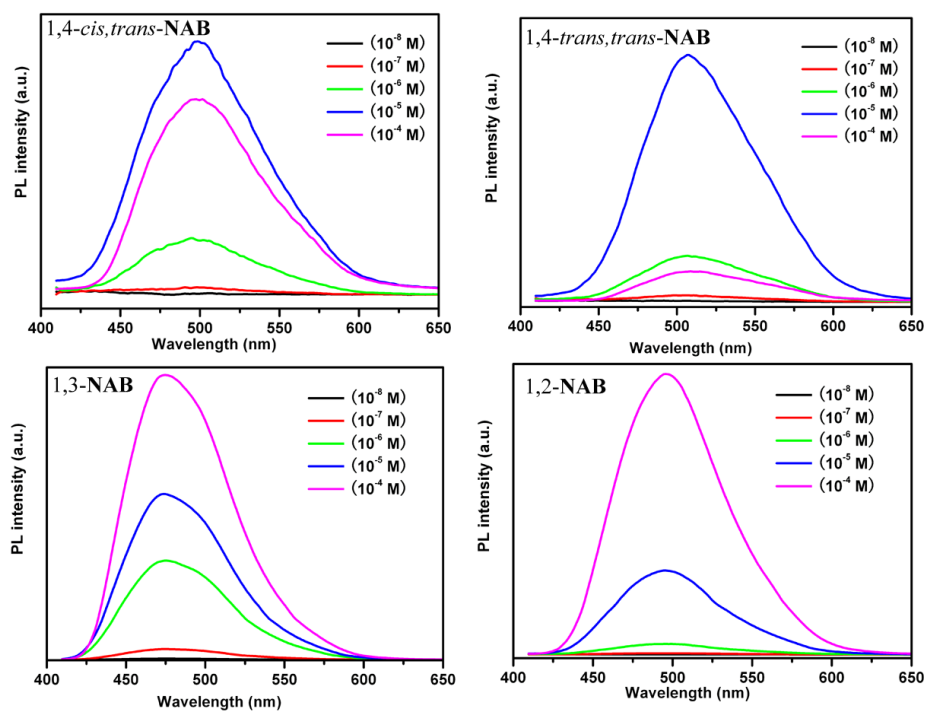

**Fig. S2** Emission spectra in  $\text{CH}_2\text{Cl}_2$  solutions with different concentrations.  $\lambda_{\text{ex}} = 389$  nm.

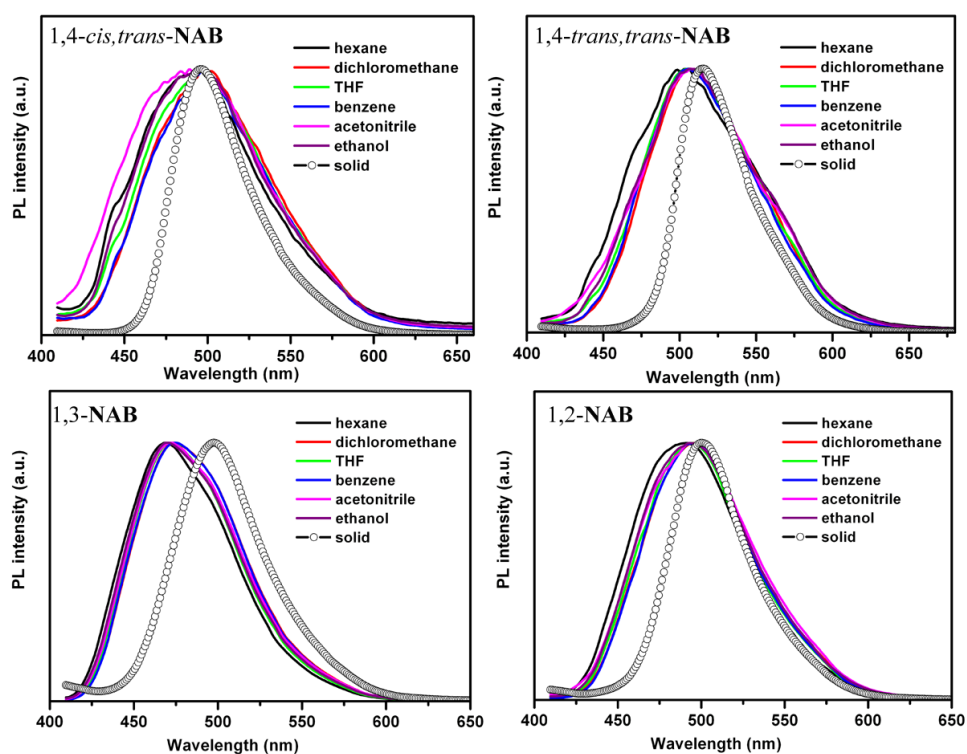

**Fig. S3** Normalized emission spectra in solvents with different polarity ( $10^{-5}$  M) and as solid film.  $\lambda_{\text{ex}} = 389$  nm.

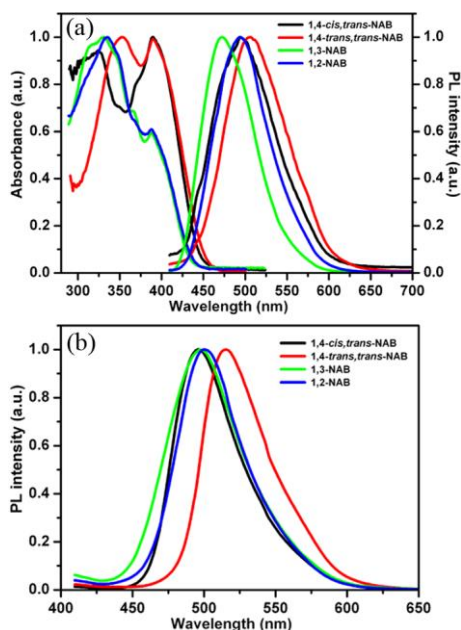

**Fig. S4** (a) Normalized optical absorption and emission spectra in THF solution (10<sup>-5</sup> M). (b) Normalized solid emission spectra. λ<sub>ex</sub> = 389 nm.

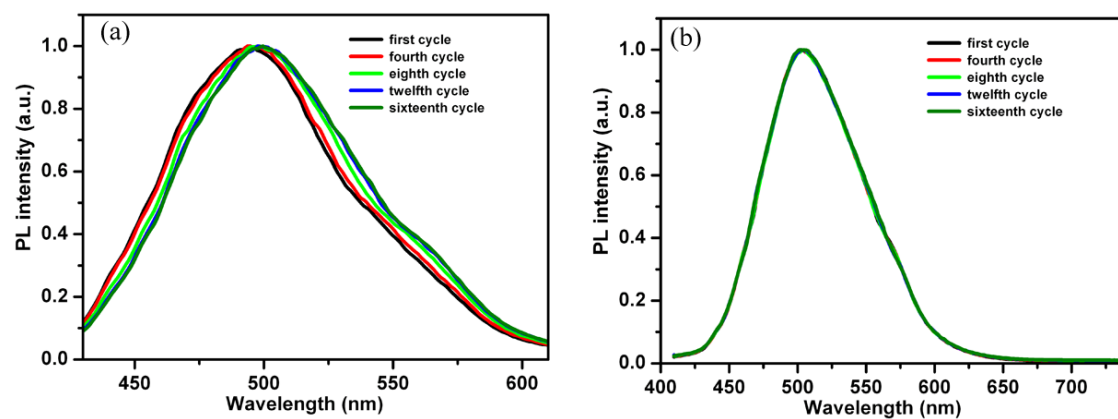

**Fig. S5** The repeated scans of emission spectra in THF solution (10<sup>-4</sup> M) at a rate of 240 nm/min from 409 to 750 nm: (a) 1,4-*cis,trans*-NAB; (b) 1,4-*trans,trans*-NAB. λ<sub>ex</sub> = 389 nm.

Table S1 Crystal data and details of collection and refinement for 1,4-*cis,trans*-**NAB**, and  
14,-*trans,trans*-**NAB**

| Compound                                            | 1,4- <i>cis,trans</i> - <b>NAB</b> | 14,- <i>trans,trans</i> - <b>NAB</b> |
|-----------------------------------------------------|------------------------------------|--------------------------------------|
| Chemical formula                                    | C <sub>34</sub> H <sub>24</sub>    | C <sub>34</sub> H <sub>24</sub>      |
| Formula Mass                                        | 432.53                             | 432.53                               |
| Crystal system                                      | Monoclinic                         | Monoclinic                           |
| <i>a</i> /Å                                         | 16.850(4)                          | 15.7869(7)                           |
| <i>b</i> /Å                                         | 6.4351(18)                         | 6.0629(3)                            |
| <i>c</i> /Å                                         | 22.782(6)                          | 25.6359(10)                          |
| $\alpha$ /°                                         | 90.00                              | 90.00                                |
| $\beta$ /°                                          | 107.41(3)                          | 107.102(5)                           |
| $\gamma$ /°                                         | 90.00                              | 90.00                                |
| <i>V</i> /Å <sup>3</sup>                            | 2357.1(11)                         | 2345.24(17)                          |
| Temperature/K                                       | 291.15                             | 291.15                               |
| Space group                                         | <i>P</i> 2 <sub>1</sub> / <i>n</i> | <i>P</i> 2 <sub>1</sub> / <i>n</i>   |
| <i>Z</i>                                            | 4                                  | 4                                    |
| No. of reflections measured                         | 12323                              | 18229                                |
| No. of independent reflections                      | 4787                               | 4800                                 |
| <i>R</i> <sub>int</sub>                             | 0.0706                             | 0.0440                               |
| <i>R</i> <sub>I</sub> ( <i>I</i> > 2σ( <i>I</i> ))  | 0.0718                             | 0.0530                               |
| <i>wR</i> <sub>2</sub> ( <i>I</i> > 2σ( <i>I</i> )) | 0.1227                             | 0.1104                               |
| <i>R</i> <sub>I</sub> (all data)                    | 0.2100                             | 0.0934                               |
| <i>wR</i> <sub>2</sub> (all data)                   | 0.1774                             | 0.1298                               |
| Goodness of fit on <i>F</i> <sup>2</sup>            | 1.025                              | 1.012                                |

References

1. G. Drefahl, G. Plötner, K. Winnefeld, *Chem. Ber.*, 1961, **94**, 2002.  
2. G. M. Sheldrick, *SHELXL-97*, University of Gottingen, Gottingen, Germany, 1997.  
3. O. V. Dolomanov, L. J. Bourhis, R. J. Gildea, J. A. K. Howard, H. Puschmann, *J. Appl. Cryst.*, 2009, **42**, 339.
